# Supplementary material
Source: MDPI journal article supplement (https://www.mdpi.com/2311-7524/9/8/885)
Supplement: s1 [file s1 › S1.xlsx]

## Sheet: Sheet1
Serial number	Number	Origin	Sample source	Serial number	Number	Origin	Sample source	Serial number	Origin	Number	Sample source
1	FF1	Chengyan, Fu'an	New	10	YF1	Banmian, Youxi	Guangxing	19	Guangping, Datian	DF1	Guangxing
			tanyang
2	FF2	Muyun, Fu'an	New	11	YF2	Banmian, Youxi	Guangxing	20	Guangping, Datian	DF2	Guangxing
			tanyang
3	FF3	Songluo, Fu'an	Nongken	12	YF3	Taixi, Youxi	Jingyunfu	21	Guangping, Datian	DF3	Guangxing
4	FF4	Songluo, Fu'an	Nongken	13	YF4	Taixi, Youxi	Jingyunfu	22	Guangping, Datian	DF4	Guangxing
5	FF5	Tantou, Fu'an	New	14	YF5	Taixi, Youxi	Jingyunfu	23	Guangping, Datian	DF5	Guangxing
			tanyang
6	FF6	Tantou, Fu'an	New	15	YF6	Taixi, Youxi	Jingyunfu	24	Guangping, Datian	DF6	Guangxing
			tanyang
7	FF7	Tantou, Fu'an	New	16	YF7	Taixi, Youxi	Jingyunfu	25	Guangping, Datian	DF7	Guangxing
			tanyang
8	FF8	Tantou, Fu'an	New	17	YF8	Taixi, Youxi	Jingyunfu	26	Guangping, Datian	DF8	Guangxing
			tanyang
9	FF9	Xibing, Fu'an	Tea bureau	18	YF9	Taixi, Youxi	Jingyunfu	27	Guangping, Datian	DF9	Guangxing
